# Supplementary material for: Sonochemical degradation of N-methylpyrrolidone and its influence on single walled carbon nanotube dispersion
Source: Royal Society of Chemistry journal article supplement (doi:10.1039/c5cc06526g), 2015-01-01
Supplement: c5cc06526g1.pdf [file c5cc06526g1.pdf]

# Sonochemical Degradation of N-Methylpyrrolidone and Its Influence on Single Walled Carbon Nanotube Dispersion

Hin Chun Yau<sup>1</sup>, Mustafa. K. Bayazit<sup>2</sup>, Joachim. H. G. Steinke<sup>1</sup>, Milo. S. P. Shaffer<sup>1\*</sup>

<sup>1</sup> Department of Chemistry, Imperial College London, South Kensington Campus, London, SW7 2AX, UK

<sup>2</sup> Department of Chemical Engineering, University College London, London, WC1E 7JE, UK

## Supporting Information

### Experimental Section

**Materials and instruments:** Semi-purified HiPco SWNTs were purchased from Unidym™ [Carbon Nanotubes, CA90425, US (Lot no. P0261)] and used as received. HPLC and anhydrous NMP were purchased from Sigma Aldrich. NMP (HPLC grade) was used as received and anhydrous NMP was de-gassed by freeze-thaw in liquid nitrogen (x 5) before use. All sonication in this experiment was carried out with 20 ml of NMP in a 30 ml glass vial. The sonicator tip was placed into the NMP about 2 cm from the bottom of vial for each experiment in order to minimise variations in power output. Sonication was carried out with 150 W power output (20% of the total output, GEX 750 ultrasonic processor with a 5 mm titanium alloy Ti-6Al-4V microtip, SONICS & MATERIALS INC, Newtown, US). The power output of the sonic probe was tested with DI water in a polystyrene insulation set up before use. A 3 L ice bath was used for each sonication. Centrifugation was performed with L-90k Optima ultracentrifuge, Beckman Coulter with a SW41 Ti rotor at 41,000 rpm, 200,000 g, for 2 hours. The top 50 % of the supernatant was collected for analysis. A control experiment was carried out with an identical procedure but omitting the sonication (the same sonic probe was simply immersed into 20 ml of NMP for 2 hrs with a 3 L ice bath).

**HiPco SWNT dispersion:** HiPco SWNTs (2mg) were mixed with 20 ml of NMP in a glass vial. The same sonic probe described above was then immersed into the NMP/SWNTs mixture, cooled with an ice bath and sonicated for 2 hours. The SWNTs/NMP mixture turned into a black dispersion within 10 seconds of initial sonication. After that the dispersion was allowed to stand overnight and top fraction (ca. 12 ml) was transferred into a centrifuge tube for centrifugation. After centrifuging the dispersion at 41,000 rpm, 200,000 g, for 2 hours, the top 50 % of the supernatant was collected as a HiPco dispersion.

**Atomic Force Microscopy (AFM):** AFM micrographs were taken in tapping mode using a Digital Instruments Multimode VIII AFM with a Nano-scope IV controller. All AFM micrographs were recorded with a resolution of 512 lines and with a typical scanning speed of 1 Hz. All micrographs were processed using NanoScope Analysis v 1.40 (R2Sr), Bruker Corporation. 3 µL of dispersion or NMP were drop-cast onto a clean silicon wafer surface (5 x 5 mm, Agar Scientific, UK). The wafers were then dried *in vacuo* overnight at room temperature, then heated to 200 °C to aid complete removal of residual NMP prior to AFM characterization.

**UV-vis spectroscopy:** The UV-vis spectra were acquired using a Lambda 950 spectrophotometer (Perkin Elmer, Waltham, MA, USA) with a 1 cm path length quartz cuvette. All spectra were recorded from 250 to 800 nm with 1 nm resolution.

**Thermogravimetric Analysis (TGA):** TGA was carried out with Pyris 1 TGA (Perkin-Elmer). Each sample was first annealed at 200 °C under nitrogen for 60 min to ensure complete removal of residue NMP, then heated from 200 to 850 °C in either air/nitrogen with a heat rate of 10 °C/min.

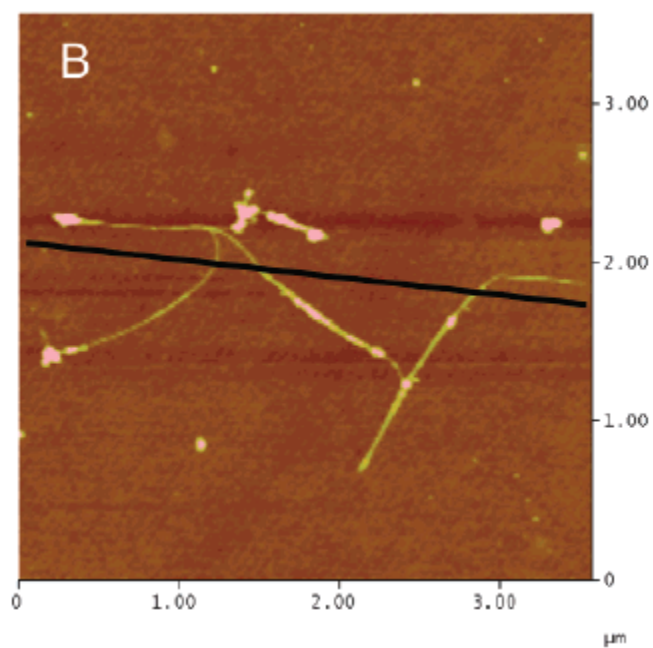

**Figure S1.** AFM image of SWNTs prepared from a N-methyl pyrrolidone (NMP) SWNTs dispersion.<sup>1</sup> (Reprinted from **ref 1** with permission from the publisher. Copyright @ 2006, American Chemical Society)

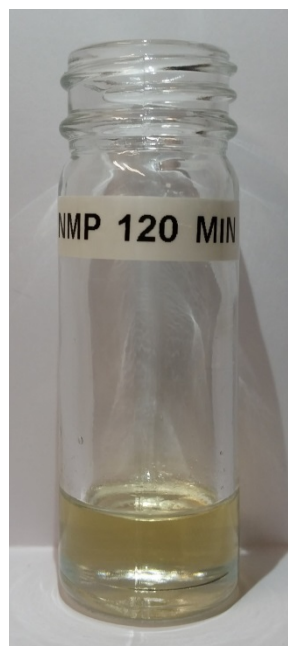

**Figure S2.** Photograph of anhydrous NMP sonicated for 120 min under nitrogen.

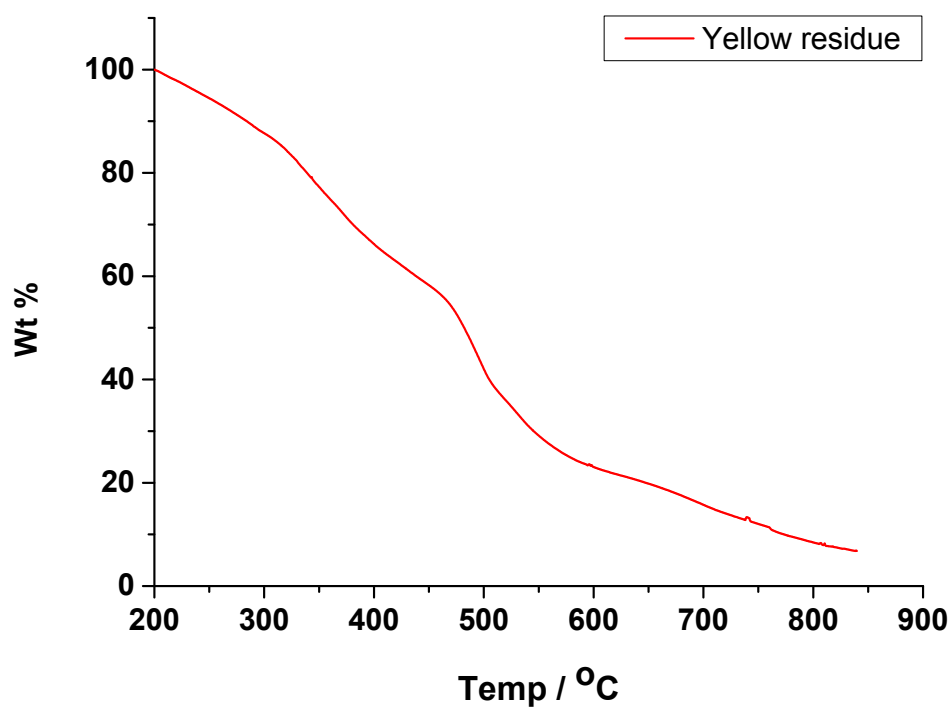

**Figure S3.** TGA (under air) of the yellow residue isolated from 120 min sonicated NMP.

The TGA was carried out under air and 95 % of the material combusted before 850 °C, confirming that the yellow residue is predominantly organic, rather than metal or metal oxide.

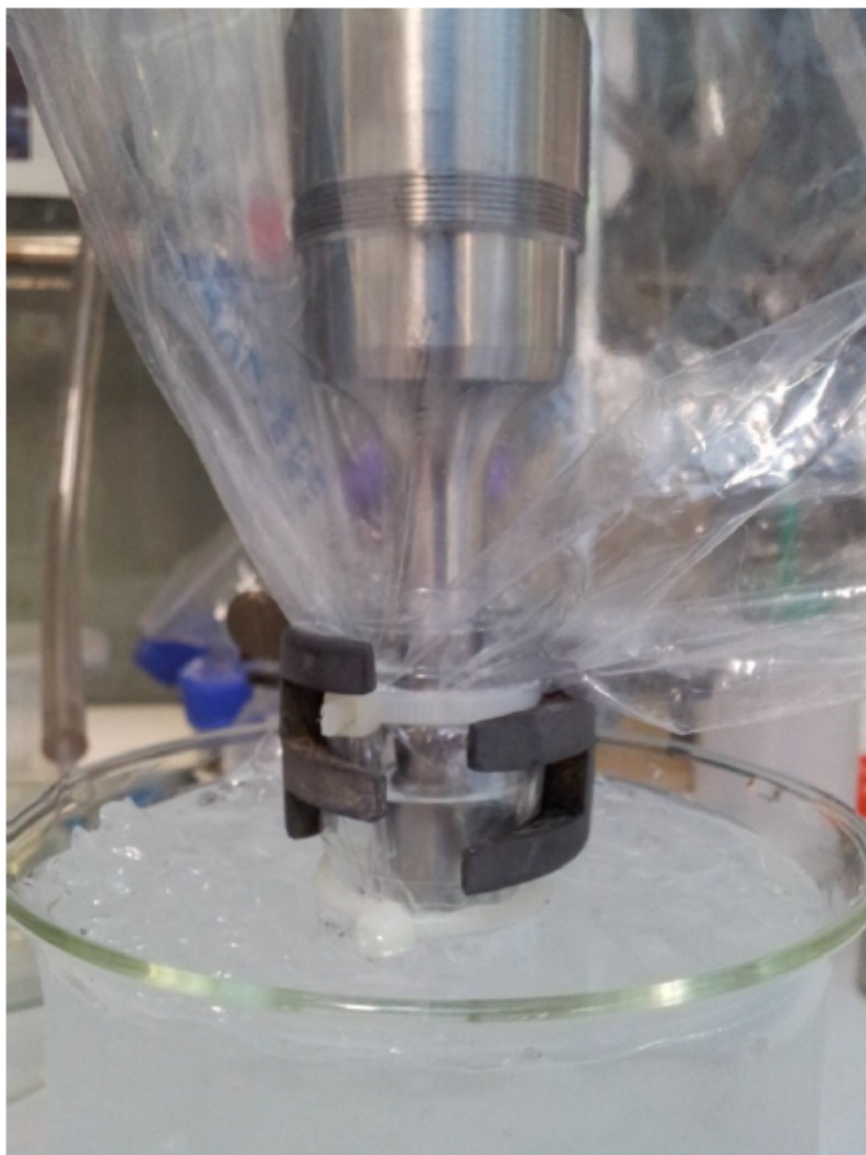

**Figure S4.** Photograph of the sonication set up for anhydrous NMP.

The sonication probe and the glass vial containing the anhydrous NMP was placed in a polypropylene (PP) bag which was connected to a nitrogen inlet. The ice bath was placed outside the PP bag to avoid water vapour condensing into the NMP.

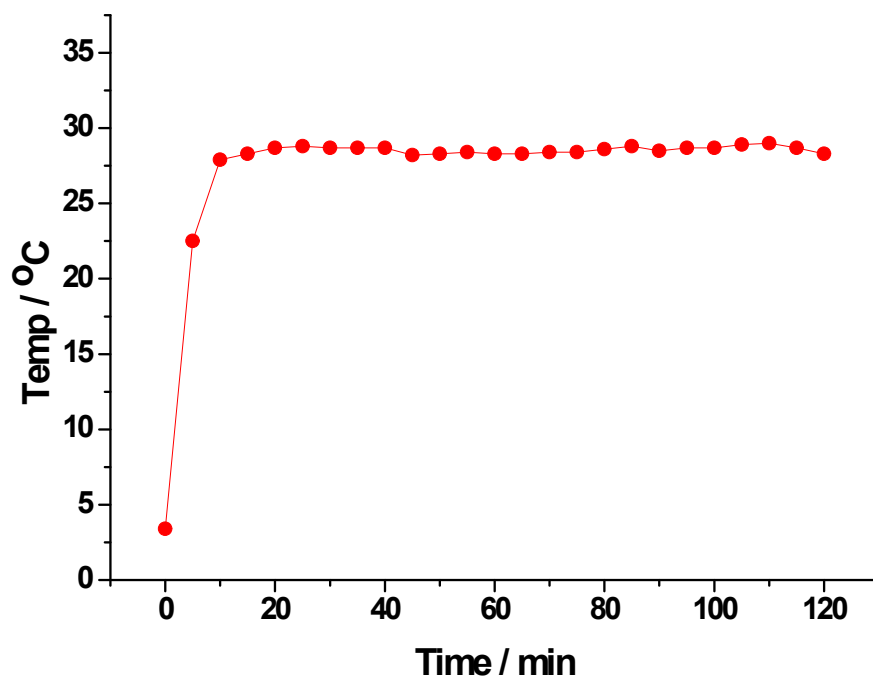

Figure S5. Temperature profile of NMP sonication (0 – 120 min)

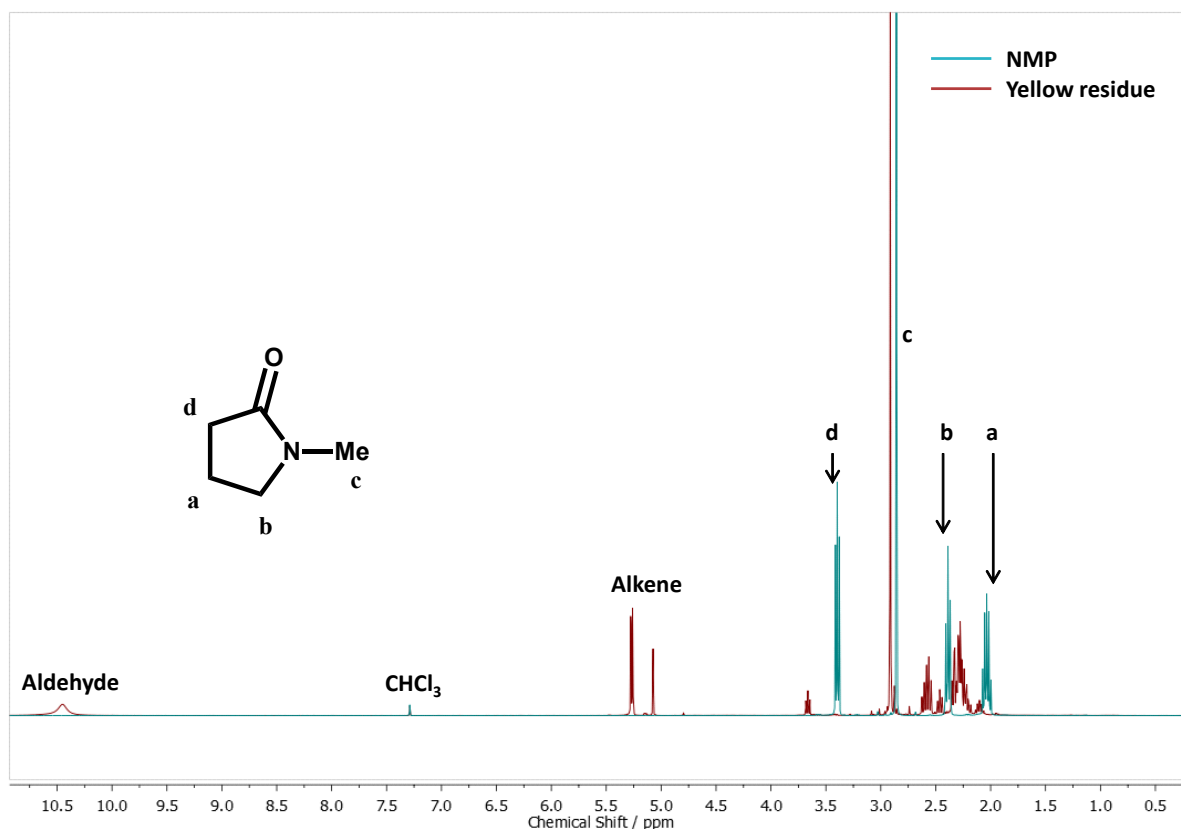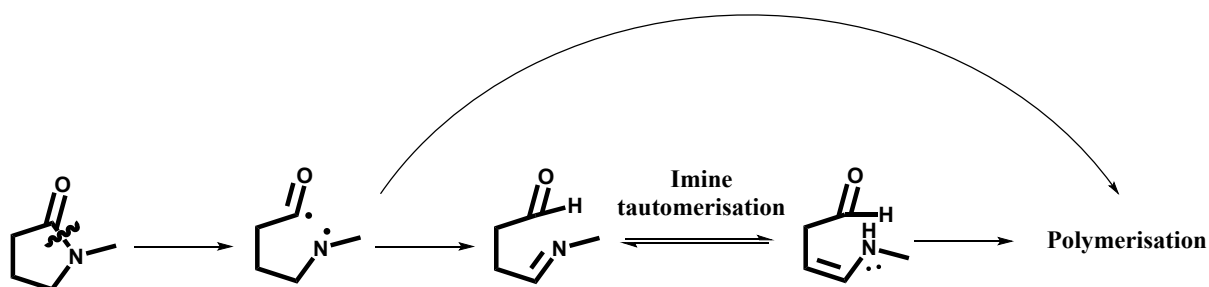

**Figure S6.** (top)  $^1\text{H}$  NMR spectrum of NMP and the yellow residue isolated from NMP, NMP signals assignment from SDBS database, AIST.  $\text{CDCl}_3$  solvent peak at 7.29 ppm. Possible newly formed aldehyde proton and alkenyl proton at 10.45 and between 5.0 – 5.5 ppm respectively. (bottom) Possible NMP sonochemical degradation pathway. Since  $^1\text{H}$  NMR confirmed the present of aldehyde in the NMP degradation product/polymer, the only possible bond to cleave in the lactam ring sonochemically is, therefore, the amide linkage, to give two neutral radicals on carbonyl and amine. The signal at 5.0 – 5.5 ppm in the  $^1\text{H}$  NMP spectrum suggests the present of alkene, therefore, the ring-opened NMP may rearrange via proton transfer to form aldehyde and imine (which can then undergo imine tautomerisation<sup>2</sup> to form enamine -N=C=C-). The radical reaction intermediate and the rearranged imine/enamine can both self polymerise or co-polymerise to give a complex, possibly cross-linked structure. The appearance of a possible N-H bond and the shift in the carbonyl stretch, in the FTIR data, are consistent with this suggestion.

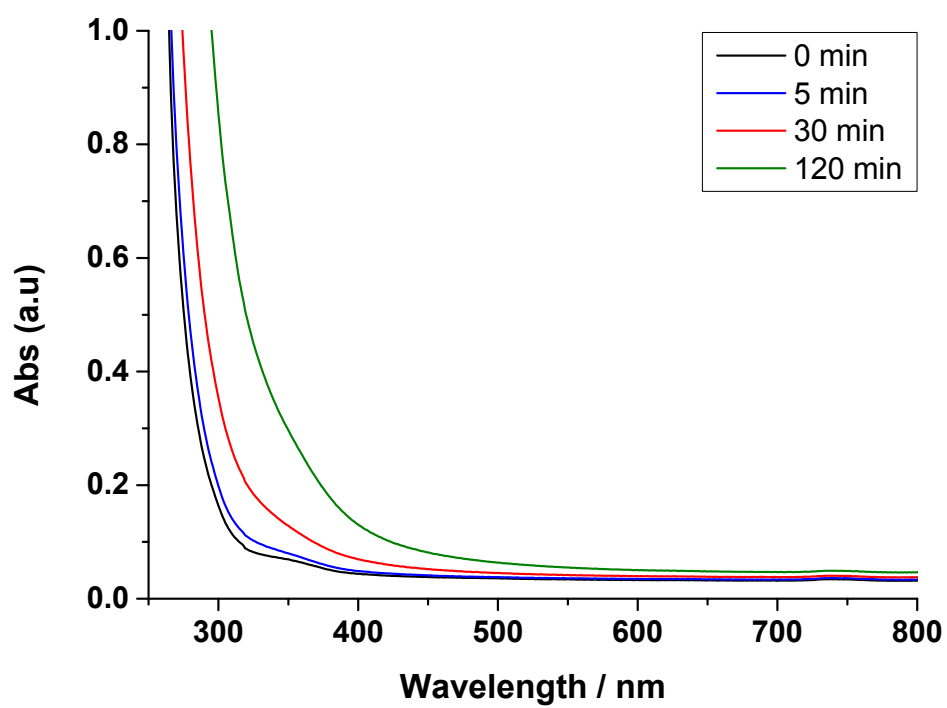

**Figure S7.** UV-vis spectra of NMPs with increasing sonication time (0, 5, 30 & 120 min)

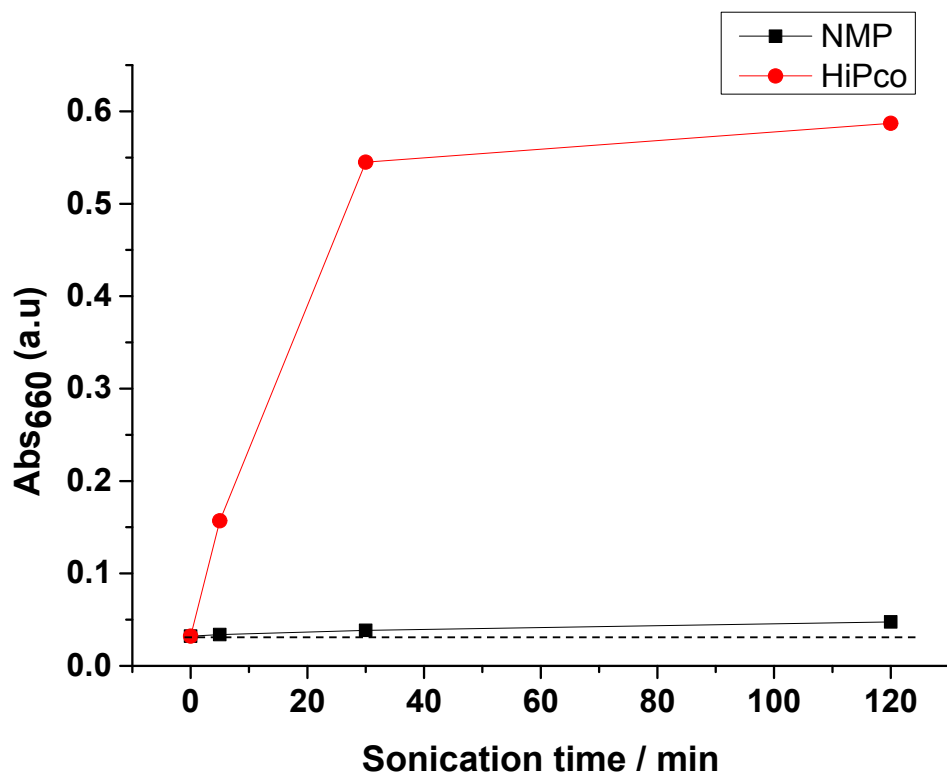

**Figure S8.** Optical absorbance at 660 nm ( $Abs_{660}$ ) of sonicated NMP and HiPco SWNT dispersions with sonication time from 0 to 120 min. Dotted line denotes a constant solvent background for NMP SWNT dispersions, as commonly used in the literature.

#### Reference

1. S. Giordani, S. D. Bergin, V. Nicolosi, S. Lebedkin, M. M. Kappes, W. J. Blau and J. N. Coleman, *The journal of physical chemistry B*, 2006, 110, 15708-15718.
2. R. A. Clark and D. C. Parker, *Journal of the American Chemical Society*, 1971, 93, 7257-7261.
